# Supplementary material for: Robotische Hernienchirurgie III
Source: Springer Nature journal article supplement (doi:10.1007/s00104-021-01480-z), 2021-08-18
Supplement: MOESM2 [file 19579214]

Patientenaufkleber

Datum: \_\_\_\_ / \_\_\_\_ / \_\_\_\_

Operateur: \_\_\_\_\_

### r-TAR-Hernie

Transversus  
Abdominis  
Release

Rückenlage  
Beide Arme angelagert  
Patienten aufklappen

Intraoperatives  
Umdocken

daVinci Anatomie:  
• Abdominal oben

daVinci Position:  
• Patient rechtes

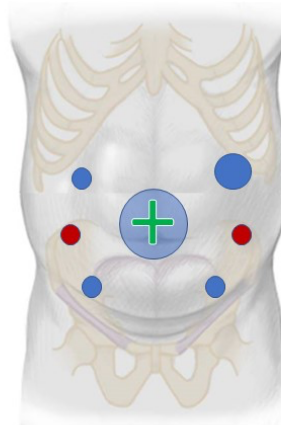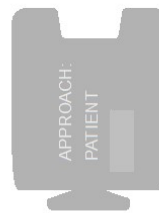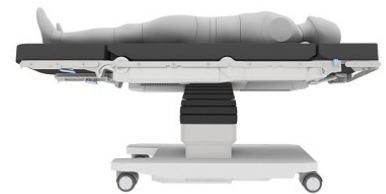

## Perioperative Prozeduren/daVinci-Checkliste (Achtung: Ersetzt nicht das WHO Team-Time-Out)

Ich habe den Aufklärungsbogen heute gesichtet und auf Inhalt und Bemerkungen hin kontrolliert:  Ja  Nein  
 Perioperative Antibiose:  Ja  Cefuroxim 1,5g (Gewichtsadaptiert) (Alternativ:  Clindamycin 600mg)  
 Hybrid-Verfahren:  Ja  Nein Wenn ja, Ansage an OTA's machen.

### **Vor Andocken: Für Double Docking vorbereiten.**

Abstand der Trokar-Linie zur Linea alba mindestens 15cm:  Ja  Nein  
 Es handelt sich nicht um ein Rezidiv:  Ja  Nein  
 Anzahl der Voroperationen bzw. Adhäsionsvorgeschichte bekannt:  Ja  Nein  
 Ropivacain-Infiltration der Portinzisionen vor dem Schnitt erfolgt:  Ja  Nein  
 Laparoskopische Sichtkontrolle der Trokareinstischstellen:  Ja  Nein

### **Konsole:**

Begin von links-lateral:  Ja  Nein  
 Komplette Adhäsilyse der vorderen Bauchdecke:  Ja  Nein  
 Einstieg in die kontralaterale Rektusscheide an der Linea alba:  Ja  Nein  
**Transversus abdominis release, top-down (gelber Pfeil) oder down-to-up (grüner Pfeil)**  
 Präparation an Rippe, Zwerchfell und Xiphoid, komplette craniale Durchtrennung  
 der posterioren Rektusscheide:  Ja  Nein  
 Präparation im Retzius- und Bogros-Raum:  Ja  Nein  
 Umdocken, analoge Präparation von rechts, Extraperitonealisierung der Ports  Ja  Nein  
 Ausschluss von peritonealen Läsionen (ggf. Nähen):  Ja  Nein  
 Mediane Naht der hinteren Rektusscheide (V-Loc 0):  Ja  Nein  
 Mediane Naht der vorderen Rektusscheide mit Bruchsack (V-Loc 0):  Ja  Nein  
 Netz-Messung, -Einrollung (mit Faden) und -Positionierung:  Ja  Nein  
**Revision der Blutstillung und Arista Bestäubung:**  Ja  Nein  
**Entlastung des Pneumopräperitoneums (3min) oder RR über 160mmHg**  Ja  Nein  
 Einlage von 2 passiv-Drainagen (rechts und links):  Ja  Nein

### **Abschluss:**

**Hybrid-Hautresektion:**  Ja  Nein  
 Fasziennaht des 12mm Portzugangs mit Endoclose (fakultativ):  Ja  Nein  
 OP-Daten in das Register eingetragen:  Ja  Nein  
 Sichtkontrolle der Port-Entfernung:  Ja  Nein

**Prästationäre Vorbereitung:**

CT-Abdomen mit transversalen und sagittalen Schnitten (Morphologie und Verwachsungen)  
Würzburg-Inzisionalhernienklassifikation

**Nahtmaterial und Aushilfsmaterialien:**

V-Loc 180 (grün) 0 USP GS-21 (30cm)  
Vicryl 2-0 SH (20cm)  
Vicryl 3-0 ohne Nadel für Netz-Einrollung  
Lineal  
Versatex Netz 30x30cm  
Markierstift  
2x passiv-Drainagen #18  
Arista AH  
Arista FlexTip XL-R Applicator

**Lagerung:**

Rückenlage  
Keine Pink-Pad  
Beide Arme ausgelagert

**Geplante OP-Zeit:** 4-6h

**CIRS Meldung:**  Ja  Nein

**Instrumente:**

30° Optik  
Prograsp Forceps  
Mega SutureCut Needle Driver  
Hot Shears MCS  
5x 8mm daVinci Ports  
1x 12mm daVinci Ports

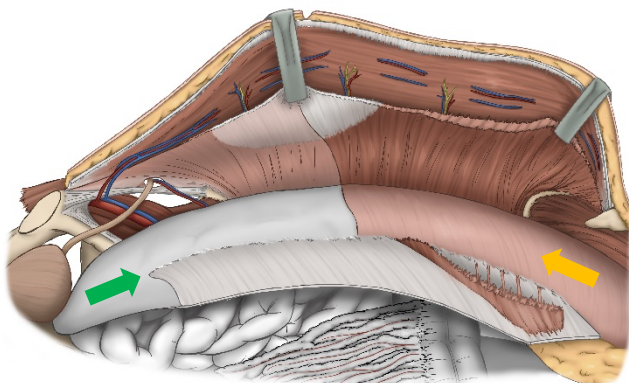

Dietz (Hrsg.) (2021) Offene Hernienchirurgie. Springer Verlag.

**Hautnaht:**

Ropivacain 0,5% 10ml  
Caprosyn 4-0 USP mit P-24 Nadel  
Glubran

**Postoperative Verordnung:**

**Unbedingt PONV-Prophylaxe beachten**  
Thromboseprophylaxe  
Mobilisation am Folgetag  
Drainage 2-3 Tage belassen  
Vollbelastung nach 3-14 Tagen  
Informationsblatt aushändigen

**DRG** G09D, Zielverweildauer: 0 | 3 | 9 Tage

Geplante Entlassung: \_\_\_\_/\_\_\_\_/\_\_\_\_

Dietz et al (2007) J Plast Reconstr Aesthet Surg 60: 383-388.

| Ocurrence     | M = morphology  | S = size (cm) | RF = risk factors (+ → +++) |
|---------------|-----------------|---------------|-----------------------------|
| p (primary)   | m (median)      | a x b         | Obesity (BMI >25)           |
| r (recurrent) | u (umbilical)   |               | Male gender                 |
|               | sp (suprapubic) |               | Nicotine abuse              |
|               | sc (subcostal)  |               | Wound contamination         |
|               | t (transversal) |               | Age > 45 years              |
|               | l (lumbal)      |               | Disease                     |
|               | pm (paramedian) |               | 2nd laparot. < 1 month      |
|               | nc (other)      |               | Emergency procedure         |
|               |                 |               | Postop. Complications       |
|               |                 |               | ...                         |

v/i M... S...x... RF...

**Debriefing: Was kann bei der nächsten OP besser gemacht werden?**
